# Supplementary material
Source: HighWire-hosted journal article supplement (https://erj.ersjournals.com/content/52/5/1801254)
Supplement: inline-supplementary-material-2 [file inline-supplementary-material-2.pdf]

## **Appendix 2; Diagnostic criteria for pleural effusions**

### **Malignant**

- a/. Malignant pleural fluid cytology or biopsy
  - or
- b/. Histologically confirmed pulmonary/extra-thoracic malignancy with radiographic evidence of metastasis to ipsilateral pleura on CT.
  - or
- c/. Radiological changes meeting Leung's criteria which have progressed in keeping with malignancy on interval CT scan in the correct clinical context.
  - or
- d/. Autopsy confirming pleural malignancy

### **Complicated Parapneumonic Effusion**

- Clinical presentation suggestive of sepsis
  - And
- a/. Pleural fluid pH  $\leq 7.2$  or pleural fluid loculation on ultrasound and follow up for at least 6 months inconsistent with pleural malignancy.
  - or
- b/. Pleural fluid gram stain or culture positive
  - Or
- c/. Frank pus
  - Or
- d/. Pleural infection confirmed by pleural biopsy histology and/or microbiological culture.
  - Or
- e/. CT scan consistent with pleural infection with radiological resolution following treatment with antibiotics.

### **Simple Parapneumonic effusion**

- Clinical presentation suggestive of sepsis with appropriate chest radiology and pleural fluid which is gram stain and culture negative with a pH  $> 7.2$  and an absence of loculation on thoracic ultrasound
  - And
- Resolution of effusion on CXR after antibiotics or clinical progression to pleural infection (see above)

### **Connective tissue disease (including RA)**

- Systemic features or known diagnosis of connective tissue disease
  - And
- chest radiology (including CT imaging) showing benign features (eg doesn't meet any of Leung's criteria) with at least 6 months follow-up and /or pleural biopsy negative for malignancy.

**Pulmonary embolism**

- Evidence of PE on CTPA

And

- No alternative explanation for pleural effusion on cross sectional imaging or pleural fluid analysis. (NB the CT shows no evidence of pleural thickening – which would suggest another cause)

**BAPE or diffuse pleural thickening due to asbestos**

- History of asbestos exposure or evidence of pleural plaques on CT

And

a/. Stable or improving CT appearances with follow-up for at least 12 months.( The development of enfolded lung is allowed)

Or

b/. Negative thoracoscopy (benign pleural biopsy)

**Congestive Cardiac Failure**

a/.History and examination features of CCF

or

b/. Evidence of at least moderate LV systolic or diastolic failure or severe valvular disease on echo

Or

c/. Improvement of effusion and symptoms with diuretic therapy

**CABG**

- CABG in 3 months prior to development of pleural effusion in the absence of an alternative cause

**Hepatic hydrothorax**

- Known history or clinical presentation consistent with liver disease

And

- Recurrent transudative pleural effusion

And

- Negative cytology

**Renal failure or hypoalbuminaemia**

- Biochemical confirmation of renal failure or hypoalbuminaemia in the absence of clinical, radiological or pleural fluid analysis suspicious of an alternative cause.

**TB pleuritis**

- Culture or AAFB positive sputum, pleural fluid or pleural tissue

And

- Resolution of pleural effusion with anti TB therapy at 6 month follow-up.

**Inflammatory pleuritis (Non-specific pleuritis)**

Demonstration of non-specific inflammatory pleuritis on pleural biopsy

And

Follow-up for 12 months without progression that would suggest a malignant cause.

**Undiagnosed**

Exhaustive investigations including 12 months follow-up with interval CT scans has not demonstrated a diagnosis

Or

Patient unfit for further investigation and follow up

Or

Patient died without definitive diagnosis and no post mortem examination conducted
